# Supplementary material for: Structurally reconstituted calcium manganate nanoparticles as a high-performance cathode for aqueous Zn-ion batteries
Source: Royal Society of Chemistry journal article supplement (doi:10.1039/d0ta10967c), 2021-01-01
Supplement: d0ta10967c1.pdf [file d0ta10967c1.pdf]

## Supporting Information

### Structural Reconstituted Calcium Manganate Nanoparticles as High-Performance Cathode for Aqueous Zn-Ion Battery

Siqi Zeng,<sup>a†</sup> Wei Xu,<sup>a</sup> Dezhou Zheng,<sup>a</sup> Haozhe Zhang,<sup>b</sup> Fuxin Wang,<sup>a\*</sup> Xiaoqing Liu,<sup>b</sup> and Xihong Lu<sup>a,b\*</sup>

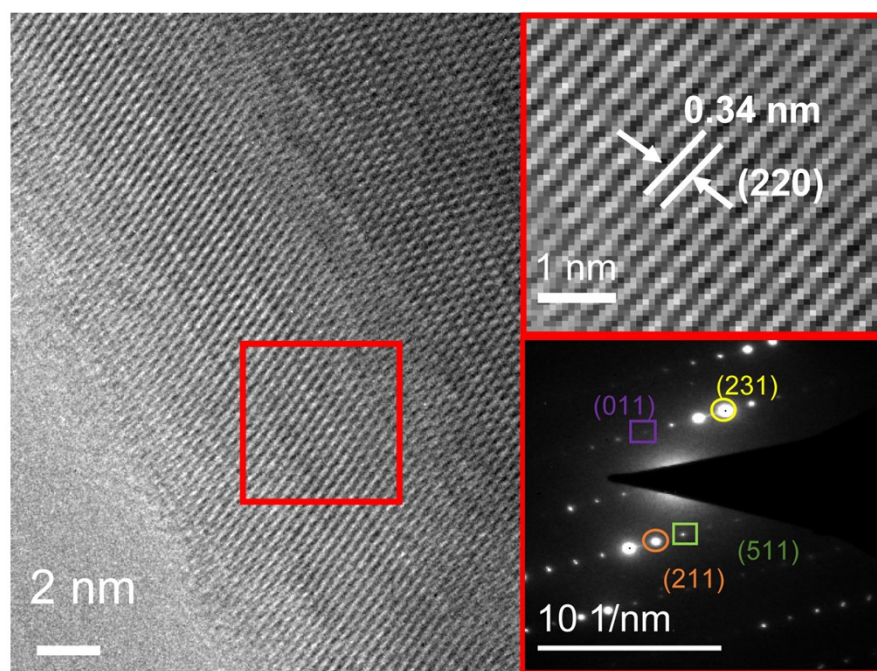

**Figure S1.** TEM, HRTEM and SAED images of CMO.

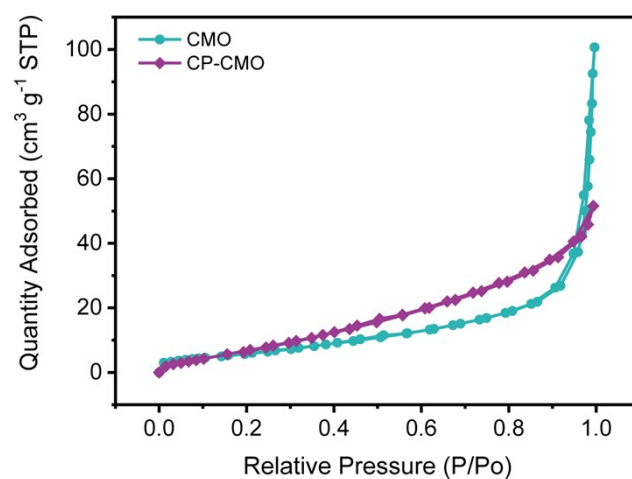

**Figure S2.** Nitrogen adsorption–desorption isotherms of the CMO and CP-CMO samples.

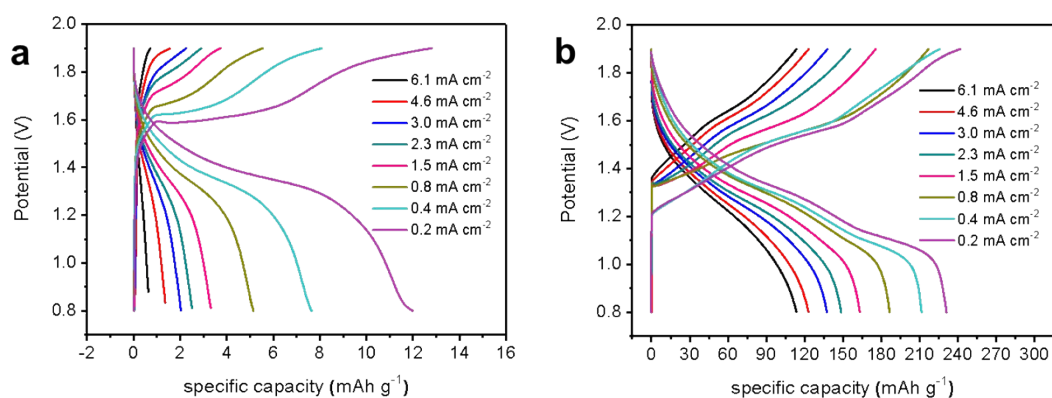

**Figure S3.** GCD curves under different current densities of (a) CMO and (b) CP-CMO electrodes.

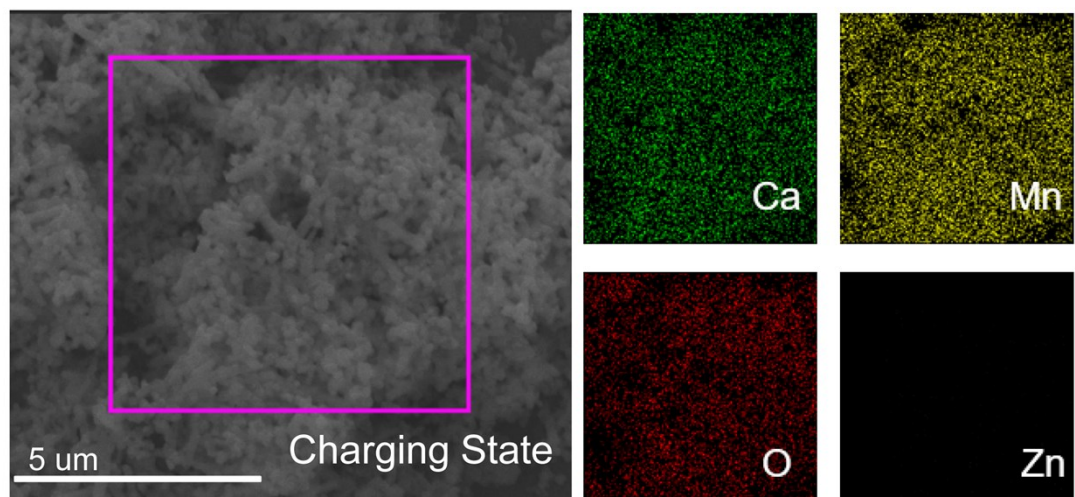

**Figure S4.** The EDS mapping results of CP-CMO at full charging state (1.9 V).

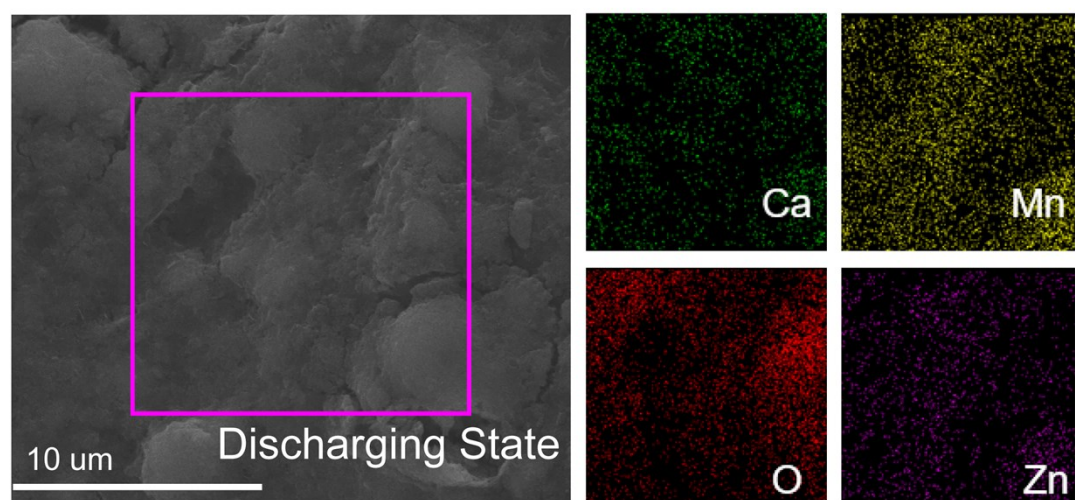

**Figure S5.** The EDS mapping results of CP-CMO at full discharging state (0.8 V).

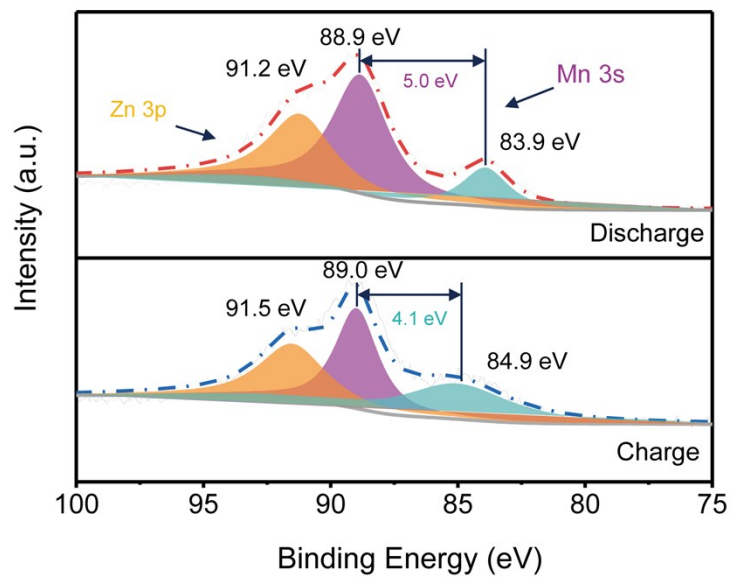

**Figure S6.** Mn 3s XPS spectra of CP-CMO in fully charged and discharged state.

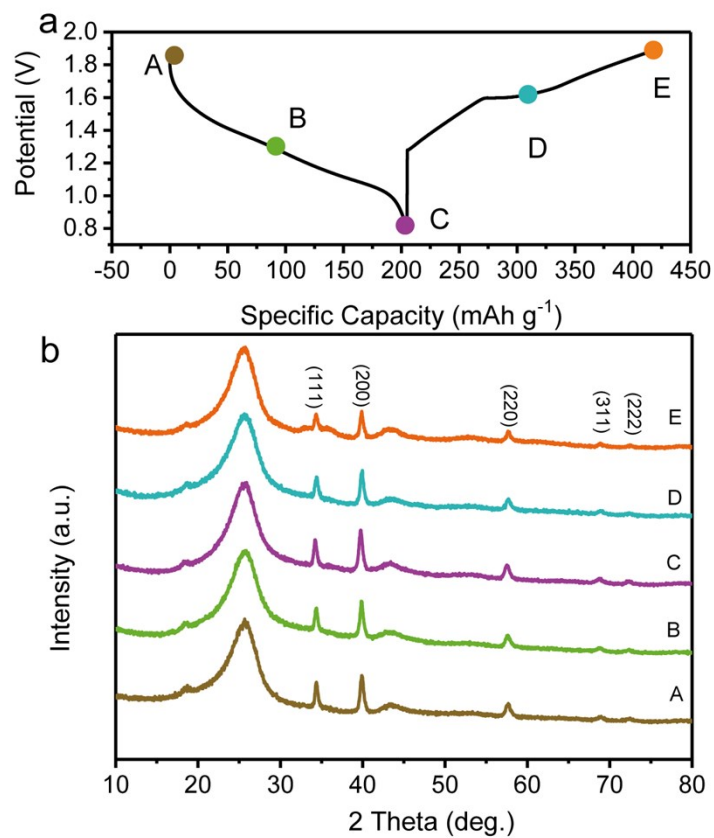

**Figure S7.** (a) The GCD profile of CP-CMO at  $0.44 \text{ mA cm}^{-2}$ . (b) Ex-situ XRD patterns of CP-CMO.

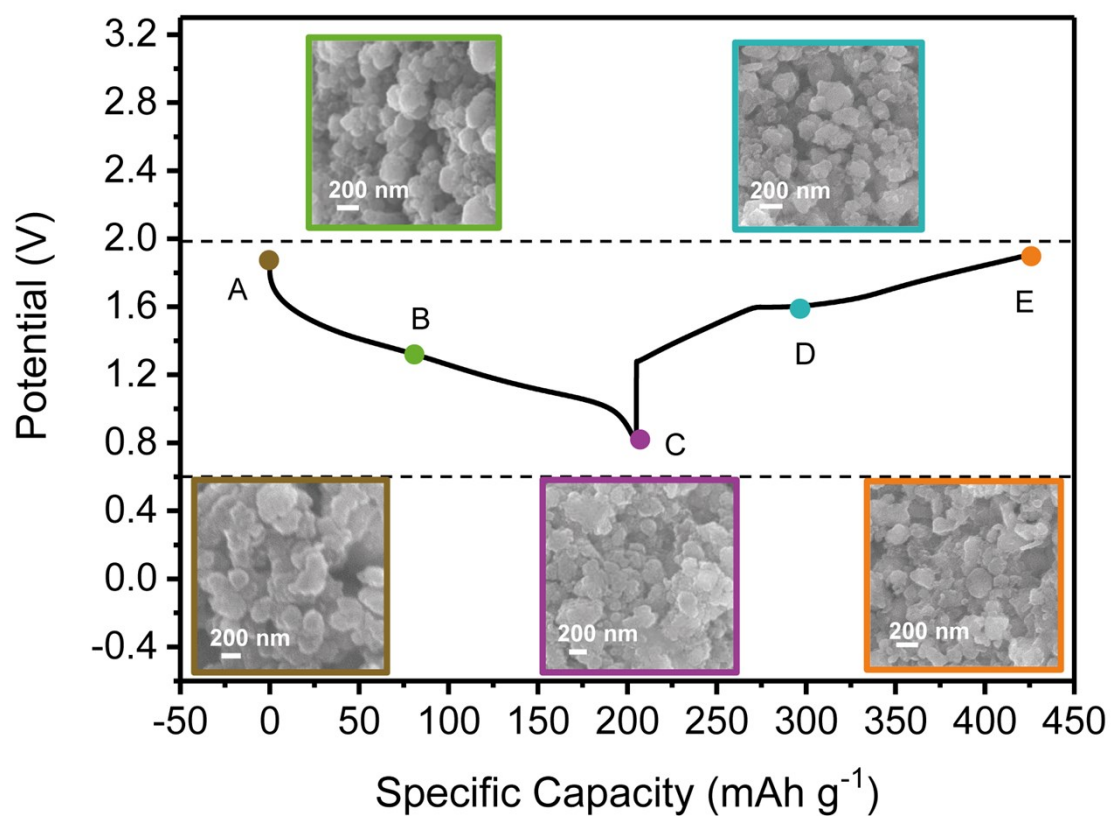

**Figure S8.** The GCD profile of CP-CMO at 0.44 mA cm<sup>-2</sup>, the insets show the SEM for different state during the charging and discharging process.

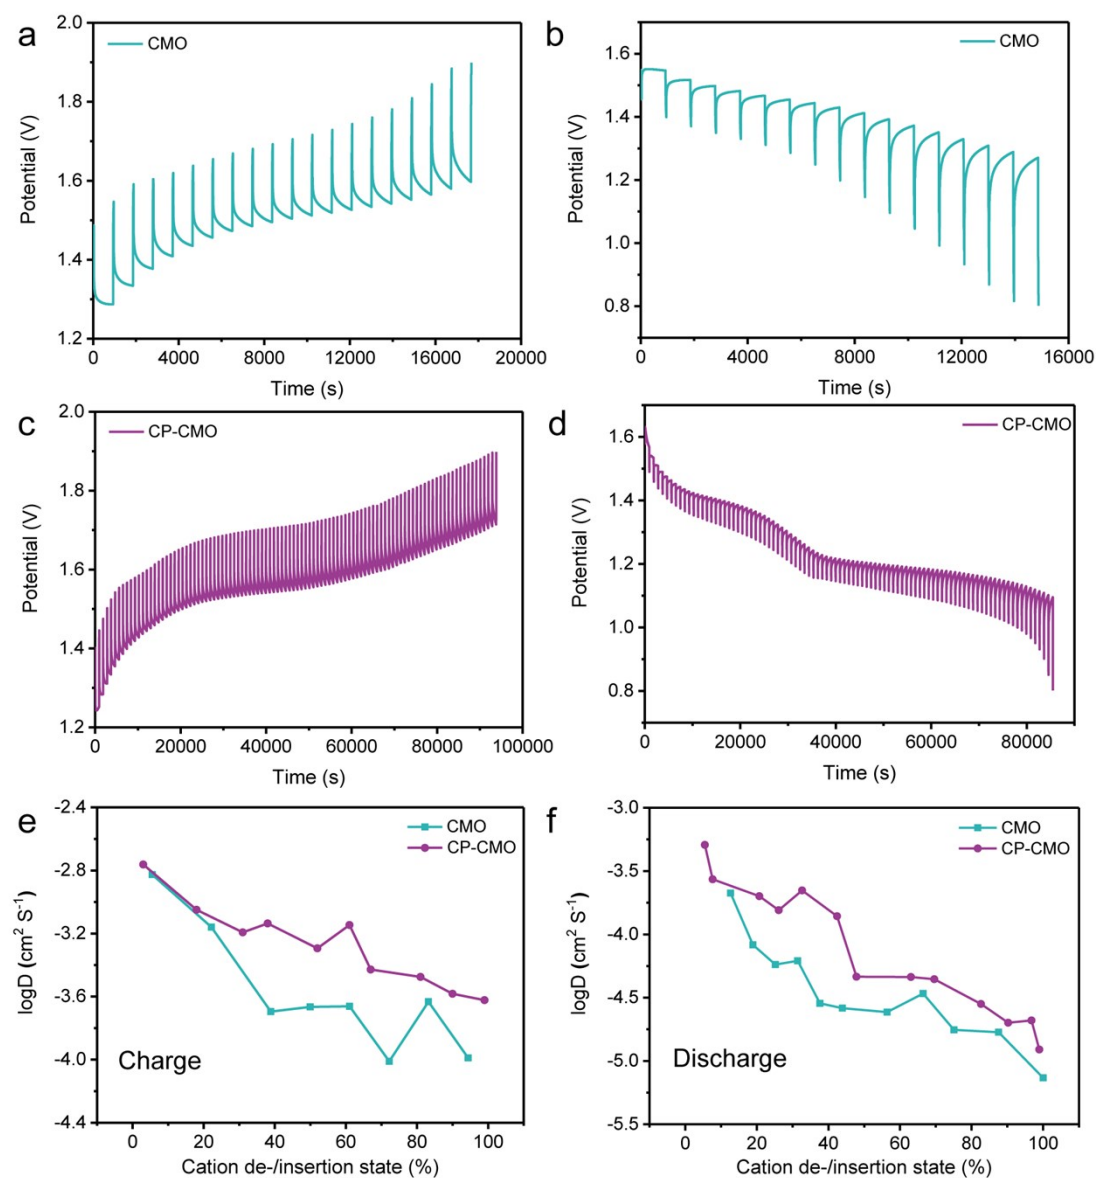

**Figure S9.** (a-d) Charge–discharge GITT curves for the CMO and CP-CMO at a current density of  $0.44 \text{ mA cm}^{-2}$ . (e-f) The corresponding Zn diffusion coefficients as a function of Zn insertion state of two samples.
